# Supplementary material for: Novel LixSiSy/Nafion as an artificial SEI film to enable dendrite-free Li metal anodes and high stability Li–S batteries
Source: Royal Society of Chemistry journal article supplement (doi:10.1039/d0ta02999h), 2020-01-01
Supplement: d0ta02999h1.pdf [file d0ta02999h1.pdf]

## Supporting information

### **Novel $\text{Li}_x\text{SiS}_y/\text{Nafion}$ as Artificial SEI Film to enable Dendrite-Free**

### **Li metal anodes and High Stability Li-S batteries**

Qi Jin,<sup>a</sup> Xitian Zhang,<sup>\*,a</sup> Hong Gao,<sup>a</sup> Lu Li,<sup>a,b</sup> and Zhiguo Zhang<sup>\*,b</sup>

<sup>a</sup> *Key Laboratory for Photonic and Electronic Bandgap Materials, Ministry of Education, School of Physics and Electronic Engineering, Harbin Normal University, Harbin 150025, People's Republic of China.<sup>1</sup>*

<sup>b</sup> *Condensed Mater Science and Technology Institute, Department of Physics, Harbin Institute of Technology, Harbin 150001, People's Republic of China.*

---

Email: [xtzhangzhang@hotmail.com](mailto:xtzhangzhang@hotmail.com) (X. Zhang), [zhangzhiguo@hit.edu.cn](mailto:zhangzhiguo@hit.edu.cn) (Z. Zhang)

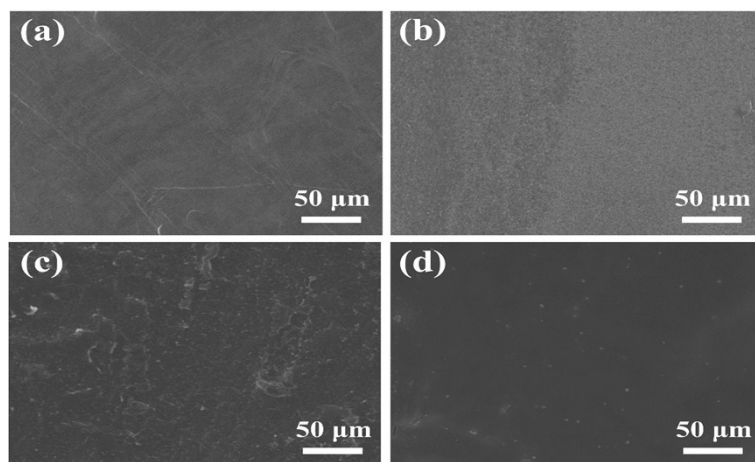

**Fig. S1.** SEM images of a (a) Li electrode, (b) Li electrode after reaction with  $\text{Li}_2\text{S}_8$ , (c)  $\text{Li-Li}_x\text{SiS}_y$  electrode, and (d) Li-LNF electrode.

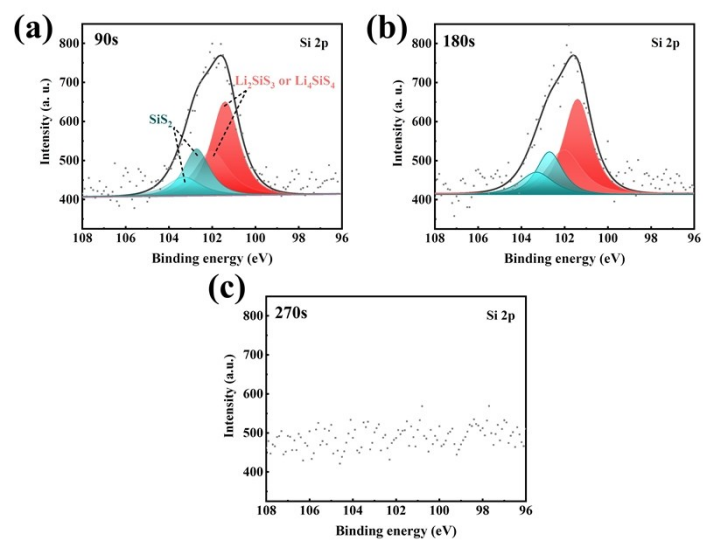

**Fig. S2.** (a-c) High-resolution XPS spectra of Si 2p for the  $\text{Li}_x\text{SiS}_y$  thin film at different sputtering times.

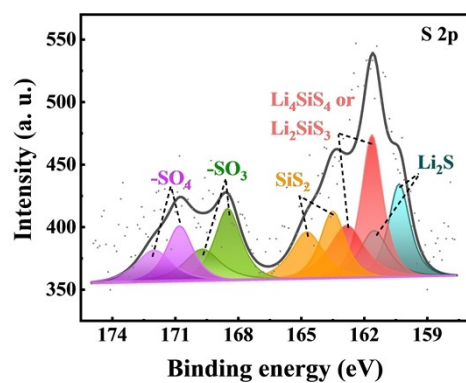

**Fig. S3.** High-resolution XPS spectra of S 2p for the  $\text{Li}_x\text{SiS}_y$  thin film.

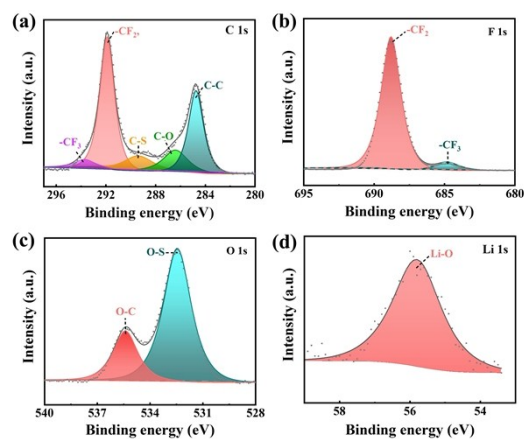

**Fig. S4.** High-resolution XPS spectra of C 1s, F 1s, O 1s and Li 1s for the lithiated Nafion layer on the Li-LNF electrode.

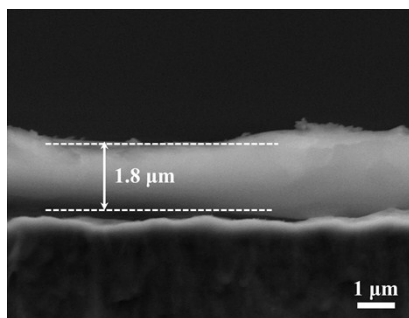

**Fig. S5.** Cross-sectional SEM image of the Li-LNF electrode.

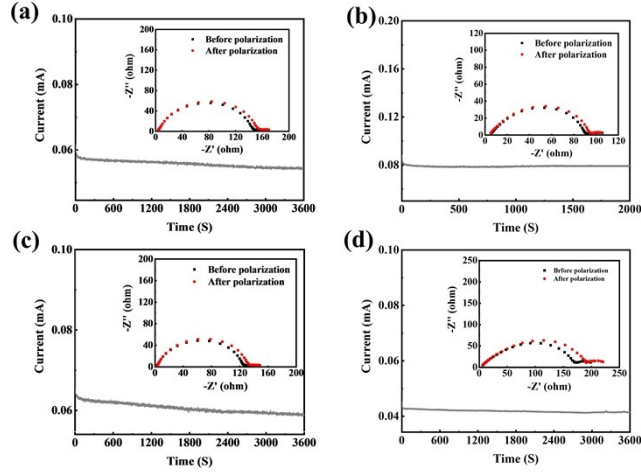

**Fig. S6.** Current-time plots of (a) Li, (b) Li-Li<sub>x</sub>SiS<sub>y</sub>, (c) Li-Nafion and (d) Li-LNF symmetric cells, using standard electrolyte after the application of a constant potential (10 mV). The inserts are the electrochemical impedance spectra before and after polarization.

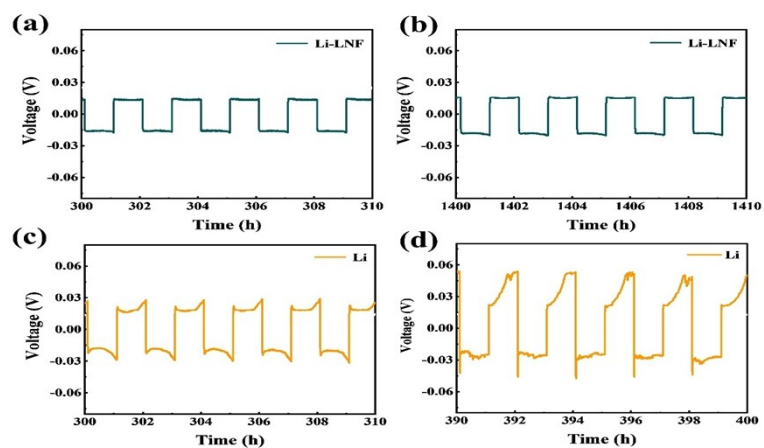

**Fig. S7.** The voltage-time profiles of symmetric cells for (a), (b) Li-LNF electrodes and (c), (d) Li electrodes at a current density of  $1 \text{ mA cm}^{-2}$  during different cycling stages.

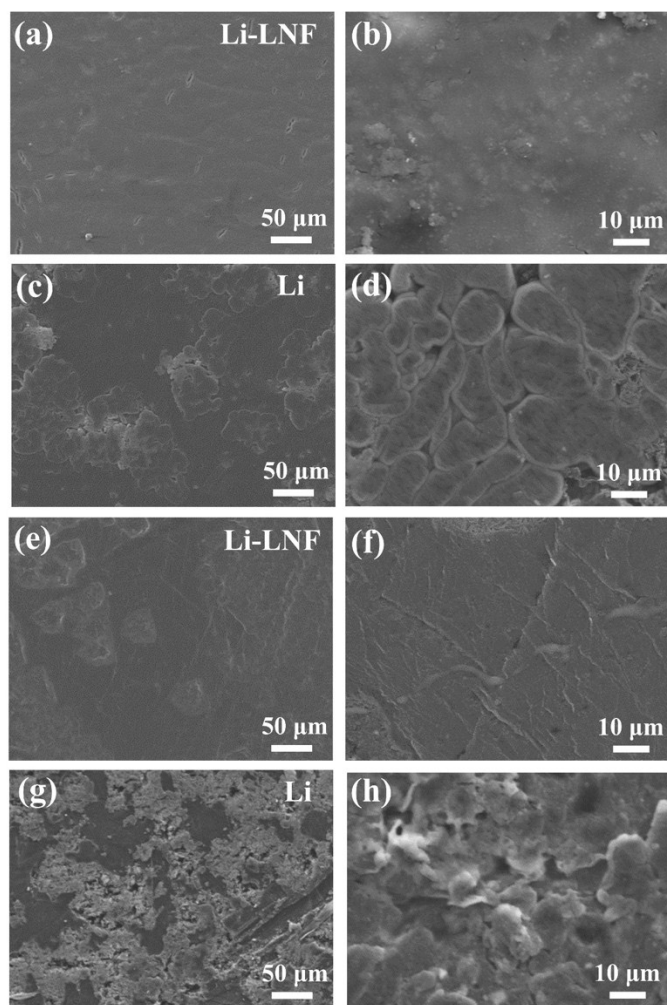

**Fig. S8.** SEM images of a deposited Li ( $1.0 \text{ mAh cm}^{-2}$ ) on (a) the Li-LNF electrode and (c) the Li electrode after 5 cycles; (b and d) the corresponding magnified SEM images from (a and c). SEM images of a stripped Li ( $1.0 \text{ mAh cm}^{-2}$ ) on (e) the Li-LNF electrode and (g) the Li electrode after 5 cycles; (f and h) the corresponding magnified SEM images from (e and g).

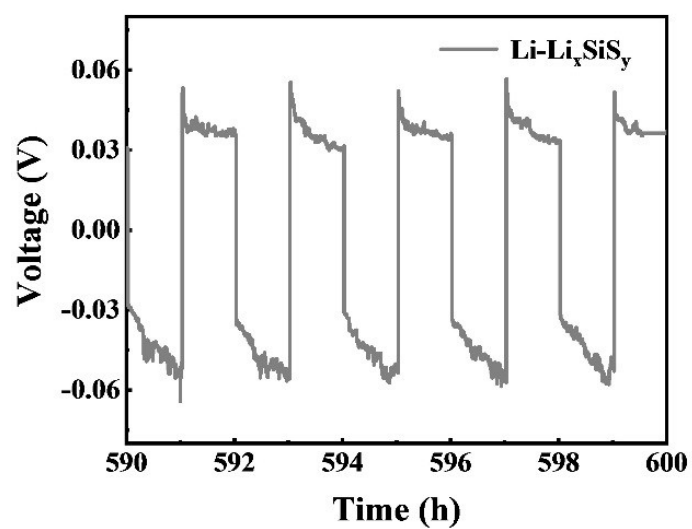

**Fig. S9.** The voltage-time profile of symmetric cells for  $\text{Li-Li}_x\text{SiS}_y$  electrodes at a current density of  $1 \text{ mA cm}^{-2}$  during different cycling stages.

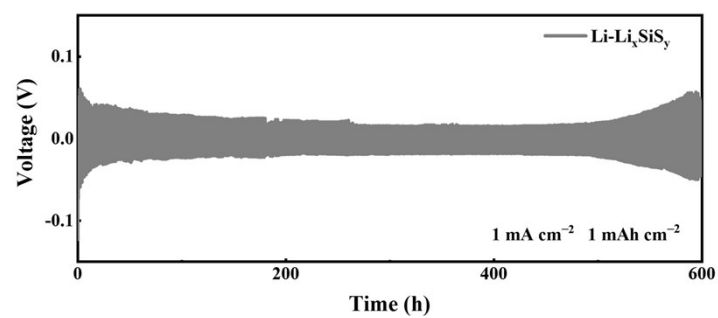

**Fig. S10.** The voltage-time profile of Li-Li<sub>x</sub>SiS<sub>y</sub> symmetric cell at current density of 1 mA cm<sup>-2</sup> and a capacity of 1 mAh cm<sup>-2</sup>.

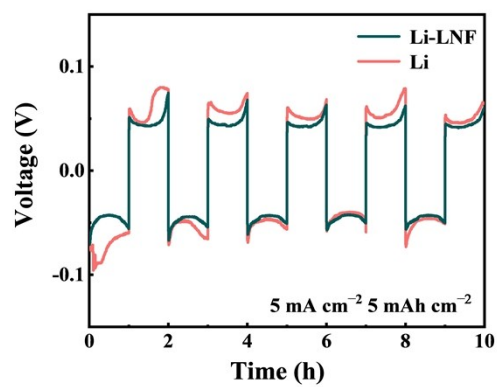

**Fig. S11.** The voltage-time profiles of Li-LNF and Li symmetric cells at current density of 5 mA cm<sup>-2</sup>, capacity of 5 mAh cm<sup>-2</sup>.

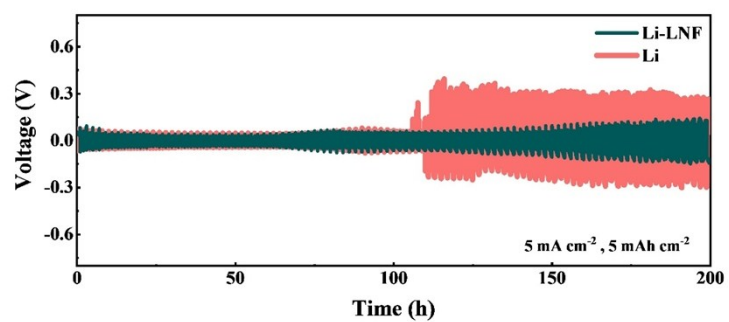

**Fig. S12.** The voltage-time profile of symmetric cells for the Li-LNF electrodes at a current density of  $5 \text{ mA cm}^{-2}$  and a capacity of  $5 \text{ mAh cm}^{-2}$ .

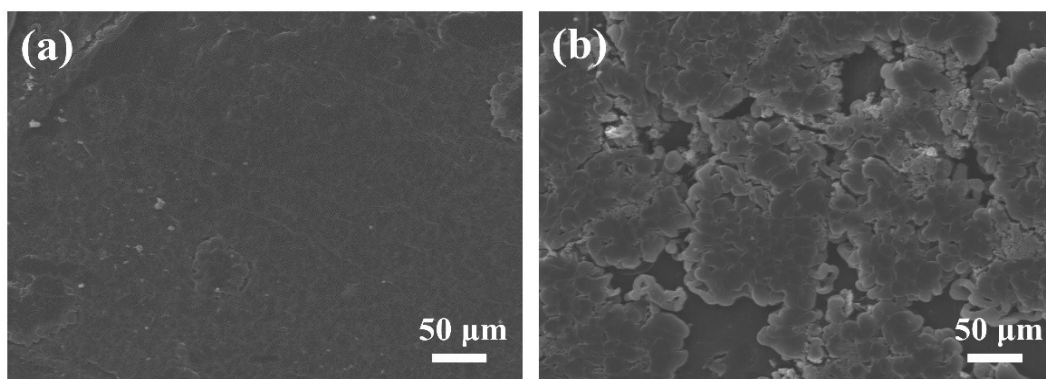

**Fig. S13.** SEM images of plated Li ( $5.0 \text{ mAh cm}^{-2}$ ) on (a) the Li-LNF electrode and (b) the Li electrode.

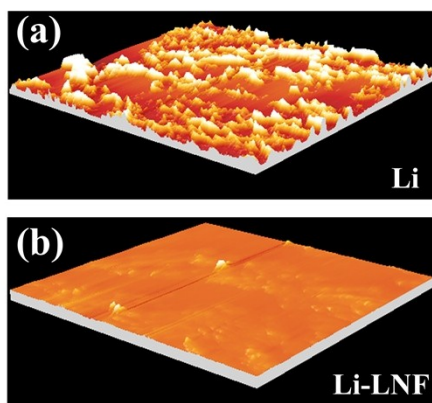

**Fig. S14.** AFM images of a deposited Li ( $5.0 \text{ mAh cm}^{-2}$ ) on (a) Li electrode and (b) Li-LNF electrode.

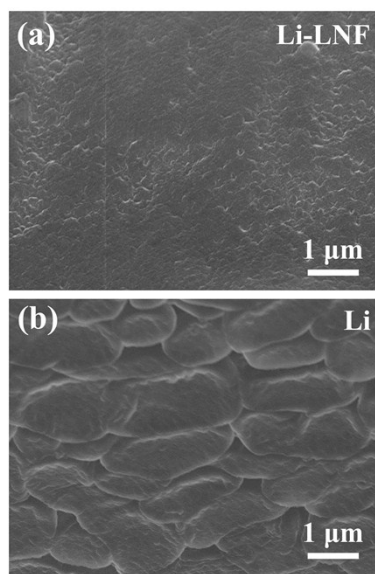

**Fig. S15.** Magnified cross-sectional SEM images of a deposited Li ( $5.0 \text{ mAh cm}^{-2}$ ) on (a) Li-LNF electrode and (b) Li electrode.

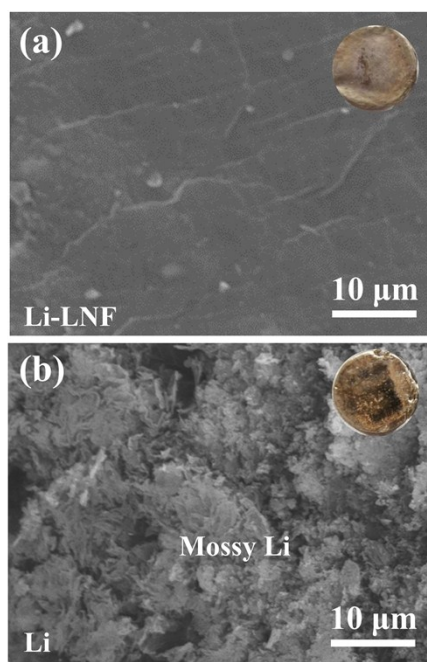

**Fig. S16.** SEM images of a stripped Li ( $5.0 \text{ mAh cm}^{-2}$ ) on (a) Li-LNF electrode and (b) Li electrode. The inserts are corresponding optical photos of the Li-LNF electrode and Li electrode, respectively.

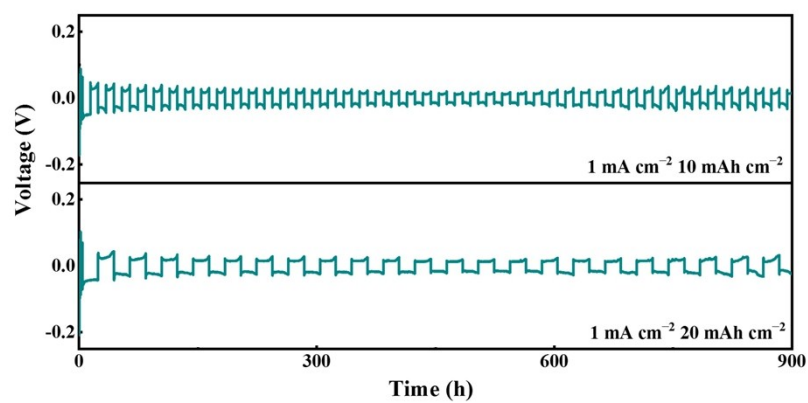

**Fig. S17.** The voltage-time profiles of Li-LNF symmetric cells at current density of  $1 \text{ mA cm}^{-2}$ , capacity of  $10 \text{ mAh cm}^{-2}$  and  $20 \text{ mAh cm}^{-2}$ .

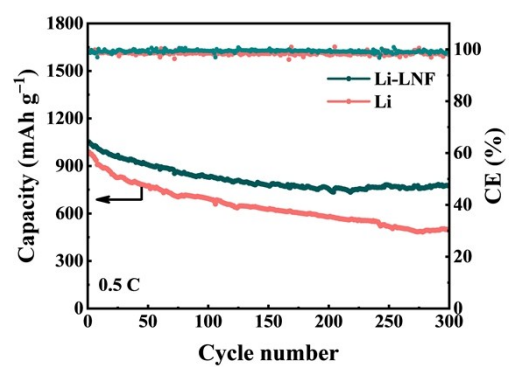

**Fig. S18.** Cycling performances of Li-S cells-II for the Li-LNF and Li anodes at 0.5 C.

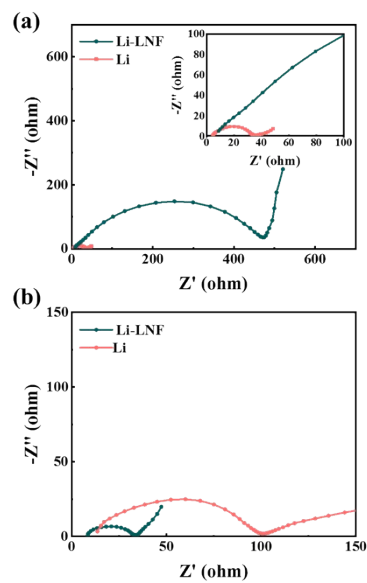

**Fig. S19.** EIS plots of Li-S cells for the Li-LNF and Li anodes (a) before cycling, (b) after 20 cycles. The inset is an enlarged EIS plot.

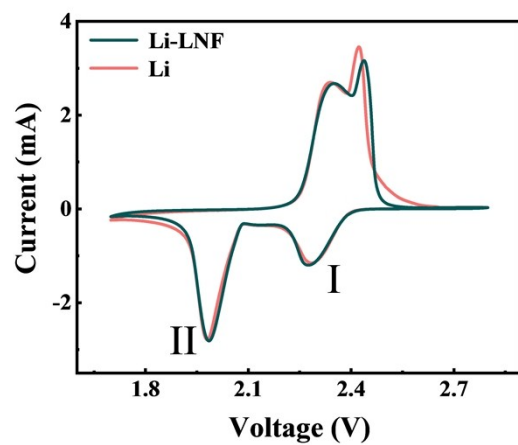

**Fig. S20.** CV curves of Li-S cells-II for the Li and Li-LNF anodes.

**Table S1.** The etching time and etching depth of Li-Li<sub>x</sub>SiS<sub>y</sub> electrode

| <b>Etching number</b>     | <b>1</b>  | <b>2</b>   | <b>3</b>   |
|---------------------------|-----------|------------|------------|
| <b>Etching Time (S)</b>   | <b>90</b> | <b>180</b> | <b>270</b> |
| <b>Etching Depth (nm)</b> | <b>67</b> | <b>134</b> | <b>200</b> |

**Table S2.** The currents and resistances obtained before/after polarization for the calculation of Li transference number

|                                         | <b><math>I_0</math> (mA)</b> | <b><math>I_s</math> (mA)</b> | <b><math>R_0</math> (<math>\Omega</math>)</b> | <b><math>R_s</math> (<math>\Omega</math>)</b> | <b><math>t_{Li+}</math></b> |
|-----------------------------------------|------------------------------|------------------------------|-----------------------------------------------|-----------------------------------------------|-----------------------------|
| <b>Li</b>                               | <b>0.062</b>                 | <b>0.055</b>                 | <b>145.3</b>                                  | <b>153.6</b>                                  | <b>0.63</b>                 |
| <b>Li-Li<sub>x</sub>SiS<sub>y</sub></b> | <b>0.088</b>                 | <b>0.079</b>                 | <b>84.7</b>                                   | <b>89.5</b>                                   | <b>0.89</b>                 |
| <b>Li-Nafion</b>                        | <b>0.065</b>                 | <b>0.059</b>                 | <b>124.7</b>                                  | <b>133.4</b>                                  | <b>0.80</b>                 |
| <b>Li-LNF</b>                           | <b>0.045</b>                 | <b>0.042</b>                 | <b>173</b>                                    | <b>190</b>                                    | <b>0.86</b>                 |
